# Supplementary material for: Effect of storage and DNA extraction method on 16S rRNA-profiled fecal microbiota in Japanese adults
Source: PubMed Central journal article supplement (PMC6436037; doi:10.3164/jcbn.18-84), 2018-12-13
Supplement: jcbn18-84st01.pdf [file jcbn18-84st01.pdf]

**Supplemental Table 1.** Fecal microbiota composition at genus level in the fresh and stored samples

| Phylum           | Class            | Order              | Family                        | Genus                               | Fresh        | DESS.1wk     | DESS.2wk     | DESS.3wk     | DESS.3wk.F   | Gua.3wk.F    | p values | q values |
|------------------|------------------|--------------------|-------------------------------|-------------------------------------|--------------|--------------|--------------|--------------|--------------|--------------|----------|----------|
| Actinobacteria   | Actinobacteria   | Bifidobacteriales  | <i>Bifidobacteriaceae</i>     | <i>Bifidobacterium</i>              | 7.11 ± 2.30  | 7.35 ± 2.35  | 8.69 ± 2.61  | 5.10 ± 1.82  | 4.81 ± 1.67  | 8.76 ± 5.25  | 0.28     | 2.53     |
| Actinobacteria   | Actinobacteria   | Actinomycetales    | <i>Micrococcaceae</i>         | <i>Rothia</i>                       | 0.00 ± 0.00  | 0.00 ± 0.00  | 0.00 ± 0.00  | 0.00 ± 0.00  | 0.01 ± 0.02  | 0.00 ± 0.00  | 0.35     | 2.52     |
| Actinobacteria   | Actinobacteria   | Bifidobacteriales  | <i>Bifidobacteriaceae</i>     | <i>Scardovia</i>                    | 0.00 ± 0.00  | 0.00 ± 0.00  | 0.00 ± 0.00  | 0.00 ± 0.00  | 0.00 ± 0.00  | 0.00 ± 0.00  | 0.44     | 1.93     |
| Actinobacteria   | Actinobacteria   | Actinomycetales    | <i>Corynebacteriaceae</i>     | <i>Corynebacterium</i>              | 0.00 ± 0.00  | 0.00 ± 0.00  | 0.00 ± 0.00  | 0.00 ± 0.00  | 0.00 ± 0.00  | 0.00 ± 0.00  | 0.46     | 1.95     |
| Actinobacteria   | Actinobacteria   | Actinomycetales    | <i>Propionibacteriaceae</i>   | <i>Propionibacterium</i>            | 0.05 ± 0.04  | 0.03 ± 0.01  | 0.03 ± 0.01  | 0.03 ± 0.03  | 0.02 ± 0.02  | 0.04 ± 0.03  | 0.75     | 1.43     |
| Actinobacteria   | Actinobacteria   | Actinomycetales    | <i>Actinomycetaceae</i>       | <i>Actinomyces</i>                  | 0.02 ± 0.01  | 0.02 ± 0.02  | 0.03 ± 0.01  | 0.02 ± 0.02  | 0.01 ± 0.02  | 0.02 ± 0.01  | 0.85     | 1.45     |
| Actinobacteria   | Coriobacteriia   | Coriobacteriales   | <i>Coriobacteriaceae</i>      | Unclassified                        | 0.01 ± 0.01  | 0.03 ± 0.05  | 0.02 ± 0.04  | 0.02 ± 0.04  | 0.02 ± 0.04  | 0.00 ± 0.01  | 0.94     | 1.31     |
| Actinobacteria   | Coriobacteriia   | Coriobacteriales   | <i>Coriobacteriaceae</i>      | <i>Eggerthella</i>                  | 0.11 ± 0.10  | 0.09 ± 0.06  | 0.08 ± 0.09  | 0.09 ± 0.11  | 0.10 ± 0.08  | 0.06 ± 0.03  | 0.97     | 1.22     |
| Actinobacteria   | Coriobacteriia   | Coriobacteriales   | <i>Coriobacteriaceae</i>      | <i>Collinsella</i>                  | 0.62 ± 0.69  | 0.80 ± 0.73  | 0.87 ± 0.92  | 0.93 ± 1.17  | 0.59 ± 0.56  | 0.68 ± 0.94  | 0.99     | 1.11     |
| Bacteroidetes    | Bacteroidia      | Bacteroidales      | <i>Bacteroidaceae</i>         | <i>Bacteroides</i>                  | 24.17 ± 4.60 | 33.28 ± 3.38 | 36.38 ± 2.84 | 34.06 ± 5.01 | 35.77 ± 5.38 | 33.65 ± 4.34 | 0.01     | 0.24     |
| Bacteroidetes    | Bacteroidia      | Bacteroidales      | S24-7                         | Unclassified                        | 0.47 ± 0.27  | 0.54 ± 0.26  | 0.19 ± 0.11  | 0.36 ± 0.30  | 0.26 ± 0.07  | 0.33 ± 0.09  | 0.19     | 2.44     |
| Bacteroidetes    | Bacteroidia      | Bacteroidales      | [ <i>Paraprevotellaceae</i> ] | [ <i>Prevotella</i> ]               | 0.08 ± 0.05  | 0.09 ± 0.04  | 0.04 ± 0.03  | 0.05 ± 0.05  | 0.05 ± 0.03  | 0.04 ± 0.02  | 0.35     | 2.35     |
| Bacteroidetes    | Bacteroidia      | Bacteroidales      | Unclassified                  | Unclassified                        | 0.01 ± 0.01  | 0.00 ± 0.00  | 0.01 ± 0.01  | 0.00 ± 0.00  | 0.01 ± 0.00  | 0.01 ± 0.01  | 0.73     | 1.53     |
| Bacteroidetes    | Bacteroidia      | Bacteroidales      | <i>Porphyromonadaceae</i>     | <i>Porphyromonas</i>                | 0.00 ± 0.00  | 0.00 ± 0.00  | 0.00 ± 0.00  | 0.00 ± 0.00  | 0.00 ± 0.00  | 0.00 ± 0.01  | 0.82     | 1.42     |
| Bacteroidetes    | Bacteroidia      | Bacteroidales      | [ <i>Barnesiellaceae</i> ]    | Unclassified                        | 0.19 ± 0.38  | 0.12 ± 0.23  | 0.12 ± 0.24  | 0.17 ± 0.33  | 0.20 ± 0.41  | 0.38 ± 0.75  | 0.96     | 1.26     |
| Bacteroidetes    | Bacteroidia      | Bacteroidales      | <i>Porphyromonadaceae</i>     | <i>Parabacteroides</i>              | 1.17 ± 1.16  | 1.90 ± 1.92  | 1.72 ± 1.67  | 1.92 ± 1.92  | 1.71 ± 1.77  | 2.53 ± 3.13  | 0.96     | 1.25     |
| Bacteroidetes    | Bacteroidia      | Bacteroidales      | <i>Rikenellaceae</i>          | Unclassified                        | 0.28 ± 0.27  | 0.24 ± 0.22  | 0.27 ± 0.31  | 0.39 ± 0.50  | 0.44 ± 0.61  | 0.39 ± 0.40  | 0.97     | 1.22     |
| Bacteroidetes    | Bacteroidia      | Bacteroidales      | [ <i>Odoribacteraceae</i> ]   | <i>Odoribacter</i>                  | 0.16 ± 0.20  | 0.14 ± 0.19  | 0.18 ± 0.23  | 0.23 ± 0.29  | 0.21 ± 0.30  | 0.24 ± 0.38  | 0.99     | 1.07     |
| Bacteroidetes    | Bacteroidia      | Bacteroidales      | <i>Prevotellaceae</i>         | <i>Prevotella</i>                   | 1.91 ± 3.69  | 1.79 ± 3.49  | 1.19 ± 2.34  | 1.67 ± 3.27  | 2.25 ± 4.47  | 2.08 ± 4.10  | 1.00     | 1.01     |
| Cyanobacteria    | Chloroplast      | Streptophyta       | Unclassified                  | Unclassified                        | 0.00 ± 0.00  | 0.00 ± 0.00  | 0.00 ± 0.00  | 0.01 ± 0.01  | 0.00 ± 0.00  | 0.00 ± 0.01  | 0.41     | 2.07     |
| Deferrribacteres | Deferrribacteres | Deferrribacterales | <i>Deferrribacteraceae</i>    | <i>Mucispirillum</i>                | 0.07 ± 0.06  | 0.05 ± 0.04  | 0.03 ± 0.02  | 0.05 ± 0.03  | 0.04 ± 0.02  | 0.07 ± 0.03  | 0.62     | 1.68     |
| Firmicutes       | Clostridia       | Clostridiales      | [ <i>Tissierellaceae</i> ]    | <i>Peptoniphilus</i>                | 0.00 ± 0.00  | 0.00 ± 0.00  | 0.00 ± 0.00  | 0.00 ± 0.00  | 0.00 ± 0.01  | 0.01 ± 0.01  | <0.01    | 0.07     |
| Firmicutes       | Clostridia       | Clostridiales      | <i>Lachnospiraceae</i>        | Unclassified                        | 6.91 ± 1.91  | 4.82 ± 1.28  | 3.71 ± 1.05  | 4.83 ± 0.89  | 5.03 ± 1.50  | 3.27 ± 0.75  | 0.01     | 0.26     |
| Firmicutes       | Bacilli          | Bacillales         | <i>Planococcaceae</i>         | <i>Lysinibacillus</i>               | 0.00 ± 0.00  | 0.00 ± 0.00  | 0.00 ± 0.00  | 0.00 ± 0.00  | 0.00 ± 0.00  | 0.00 ± 0.00  | 0.09     | 1.84     |
| Firmicutes       | Bacilli          | Lactobacillales    | <i>Carnobacteriaceae</i>      | <i>Granulicatella</i>               | 0.01 ± 0.01  | 0.00 ± 0.00  | 0.00 ± 0.00  | 0.00 ± 0.01  | 0.00 ± 0.00  | 0.00 ± 0.00  | 0.11     | 1.83     |
| Firmicutes       | Erysipelotrichi  | Erysipelotrichales | <i>Erysipelotrichaceae</i>    | <i>Coprobacillus</i>                | 0.07 ± 0.04  | 0.04 ± 0.03  | 0.03 ± 0.02  | 0.03 ± 0.02  | 0.05 ± 0.03  | 0.02 ± 0.02  | 0.22     | 2.42     |
| Firmicutes       | Bacilli          | Lactobacillales    | <i>Lactobacillaceae</i>       | <i>Lactobacillus</i>                | 0.13 ± 0.05  | 0.14 ± 0.07  | 0.07 ± 0.04  | 0.07 ± 0.06  | 0.17 ± 0.14  | 0.16 ± 0.07  | 0.32     | 2.49     |
| Firmicutes       | Bacilli          | Bacillales         | [ <i>Exiguobacteraceae</i> ]  | Unclassified                        | 0.01 ± 0.01  | 0.00 ± 0.00  | 0.01 ± 0.01  | 0.00 ± 0.00  | 0.01 ± 0.00  | 0.00 ± 0.00  | 0.39     | 2.34     |
| Firmicutes       | Bacilli          | Lactobacillales    | <i>Streptococcaceae</i>       | <i>Streptococcus</i>                | 1.29 ± 0.74  | 0.83 ± 0.45  | 0.69 ± 0.43  | 0.82 ± 0.51  | 0.68 ± 0.42  | 0.57 ± 0.29  | 0.40     | 2.25     |
| Firmicutes       | Clostridia       | Clostridiales      | <i>Lachnospiraceae</i>        | <i>Blautia</i>                      | 6.46 ± 3.34  | 3.97 ± 2.03  | 3.27 ± 1.58  | 3.73 ± 2.10  | 3.73 ± 2.18  | 3.75 ± 1.93  | 0.42     | 2.00     |
| Firmicutes       | Clostridia       | Clostridiales      | [ <i>Tissierellaceae</i> ]    | <i>Anaerococcus</i>                 | 0.00 ± 0.01  | 0.00 ± 0.00  | 0.00 ± 0.00  | 0.00 ± 0.00  | 0.00 ± 0.00  | 0.01 ± 0.02  | 0.42     | 1.95     |
| Firmicutes       | Erysipelotrichi  | Erysipelotrichales | <i>Erysipelotrichaceae</i>    | Unclassified                        | 1.00 ± 0.67  | 0.57 ± 0.37  | 0.56 ± 0.42  | 0.58 ± 0.53  | 0.50 ± 0.32  | 0.36 ± 0.24  | 0.49     | 1.97     |
| Firmicutes       | Clostridia       | Clostridiales      | <i>Lachnospiraceae</i>        | <i>Oribacterium</i>                 | 0.00 ± 0.00  | 0.00 ± 0.00  | 0.00 ± 0.00  | 0.00 ± 0.00  | 0.00 ± 0.00  | 0.00 ± 0.01  | 0.49     | 1.90     |
| Firmicutes       | Clostridia       | Clostridiales      | <i>Roseburia</i>              | 3.26 ± 1.78                         | 1.81 ± 0.65  | 1.75 ± 0.77  | 2.04 ± 1.01  | 2.38 ± 1.34  | 2.03 ± 1.53  | 0.56         | 1.71     |          |
| Firmicutes       | Clostridia       | Clostridiales      | <i>Peptostreptococcaceae</i>  | <i>Peptostreptococcus</i>           | 0.01 ± 0.01  | 0.00 ± 0.01  | 0.02 ± 0.03  | 0.00 ± 0.01  | 0.00 ± 0.00  | 0.00 ± 0.00  | 0.59     | 1.76     |
| Firmicutes       | Clostridia       | Clostridiales      | [ <i>Tissierellaceae</i> ]    | <i>Parvimonas</i>                   | 0.01 ± 0.01  | 0.01 ± 0.01  | 0.01 ± 0.01  | 0.00 ± 0.00  | 0.00 ± 0.00  | 0.01 ± 0.01  | 0.61     | 1.76     |
| Firmicutes       | Clostridia       | Clostridiales      | <i>Peptococcaceae</i>         | Unclassified                        | 0.00 ± 0.00  | 0.00 ± 0.00  | 0.00 ± 0.00  | 0.00 ± 0.00  | 0.00 ± 0.00  | 0.00 ± 0.00  | 0.62     | 1.73     |
| Firmicutes       | Bacilli          | Lactobacillales    | <i>Leuconostocaceae</i>       | <i>Leuconostoc</i>                  | 0.00 ± 0.00  | 0.00 ± 0.00  | 0.00 ± 0.00  | 0.00 ± 0.00  | 0.00 ± 0.00  | 0.00 ± 0.00  | 0.64     | 1.65     |
| Firmicutes       | Clostridia       | Clostridiales      | <i>Lachnospiraceae</i>        | <i>Coprococcus</i>                  | 4.05 ± 2.76  | 2.50 ± 1.82  | 2.03 ± 1.44  | 2.52 ± 1.78  | 1.98 ± 1.41  | 2.23 ± 2.10  | 0.68     | 1.63     |
| Firmicutes       | Clostridia       | Clostridiales      | <i>Ruminococcaceae</i>        | <i>Clostridium</i>                  | 0.01 ± 0.01  | 0.01 ± 0.01  | 0.01 ± 0.02  | 0.00 ± 0.01  | 0.01 ± 0.01  | 0.01 ± 0.01  | 0.69     | 1.63     |
| Firmicutes       | Bacilli          | Lactobacillales    | <i>Leuconostocaceae</i>       | <i>Weissella</i>                    | 0.00 ± 0.00  | 0.00 ± 0.01  | 0.00 ± 0.00  | 0.00 ± 0.00  | 0.00 ± 0.00  | 0.00 ± 0.00  | 0.72     | 1.61     |
| Firmicutes       | Clostridia       | Clostridiales      | [ <i>Tissierellaceae</i> ]    | WAL_1855D                           | 0.01 ± 0.01  | 0.00 ± 0.00  | 0.00 ± 0.00  | 0.00 ± 0.00  | 0.00 ± 0.00  | 0.01 ± 0.00  | 0.72     | 1.56     |
| Firmicutes       | Clostridia       | Clostridiales      | <i>Christensenellaceae</i>    | Unclassified                        | 0.01 ± 0.01  | 0.00 ± 0.00  | 0.00 ± 0.00  | 0.00 ± 0.01  | 0.01 ± 0.01  | 0.01 ± 0.01  | 0.73     | 1.50     |
| Firmicutes       | Bacilli          | Bacillales         | <i>Staphylococcaceae</i>      | <i>Staphylococcus</i>               | 0.01 ± 0.01  | 0.01 ± 0.00  | 0.00 ± 0.00  | 0.01 ± 0.01  | 0.00 ± 0.01  | 0.01 ± 0.01  | 0.74     | 1.46     |
| Firmicutes       | Clostridia       | Clostridiales      | <i>Ruminococcaceae</i>        | <i>Anaerotruncus</i>                | 0.02 ± 0.02  | 0.02 ± 0.01  | 0.01 ± 0.01  | 0.03 ± 0.03  | 0.01 ± 0.01  | 0.02 ± 0.02  | 0.74     | 1.44     |
| Firmicutes       | Clostridia       | Clostridiales      | <i>Eubacteriaceae</i>         | <i>Pseudoramibacter_Eubacterium</i> | 0.01 ± 0.01  | 0.00 ± 0.00  | 0.00 ± 0.00  | 0.00 ± 0.01  | 0.00 ± 0.01  | 0.01 ± 0.01  | 0.85     | 1.43     |
| Firmicutes       | Clostridia       | Clostridiales      | <i>Lachnospiraceae</i>        | <i>Dorea</i>                        | 0.94 ± 0.56  | 0.78 ± 0.60  | 0.83 ± 0.65  | 0.67 ± 0.56  | 0.74 ± 0.52  | 0.44 ± 0.38  | 0.85     | 1.42     |
| Firmicutes       | Clostridia       | Clostridiales      | <i>Lachnospiraceae</i>        | [ <i>Ruminococcus</i> ]             | 3.80 ± 2.76  | 2.80 ± 1.91  | 2.38 ± 1.79  | 2.86 ± 2.16  | 2.40 ± 1.77  | 2.08 ± 1.22  | 0.87     | 1.41     |
| Firmicutes       | Clostridia       | Clostridiales      | <i>Ruminococcaceae</i>        | <i>Butyrivococcus</i>               | 0.77 ± 0.44  | 0.65 ± 0.40  | 0.78 ± 0.53  | 0.55 ± 0.31  | 0.59 ± 0.30  | 0.50 ± 0.27  | 0.88     | 1.39     |
| Firmicutes       | Clostridia       | Clostridiales      | <i>Clostridiaceae</i>         | SMB53                               | 0.12 ± 0.07  | 0.17 ± 0.14  | 0.15 ± 0.15  | 0.17 ± 0.12  | 0.09 ± 0.07  | 0.18 ± 0.16  | 0.89     | 1.36     |
| Firmicutes       | Bacilli          | Lactobacillales    | <i>Streptococcaceae</i>       | <i>Lactococcus</i>                  | 0.03 ± 0.06  | 0.01 ± 0.01  | 0.02 ± 0.04  | 0.01 ± 0.01  | 0.02 ± 0.03  | 0.01 ± 0.02  | 0.91     | 1.36     |
| Firmicutes       | Clostridia       | Clostridiales      | <i>Lachnospiraceae</i>        | <i>Clostridium</i>                  | 0.40 ± 0.62  | 0.21 ± 0.30  | 0.18 ± 0.25  | 0.24 ± 0.32  | 0.31 ± 0.42  | 0.12 ± 0.14  | 0.92     | 1.34     |
| Firmicutes       | Bacilli          | Bacillales         | <i>Bacillaceae</i>            | <i>Bacillus</i>                     | 0.03 ± 0.06  | 0.02 ± 0.03  | 0.01 ± 0.02  | 0.02 ± 0.03  | 0.01 ± 0.02  | 0.03 ± 0.07  | 0.93     | 1.32     |
| Firmicutes       | Clostridia       | Clostridiales      | <i>Clostridiaceae</i>         | <i>Clostridium</i>                  | 1.03 ± 1.19  | 0.71 ± 0.73  | 0.59 ± 0.67  | 0.59 ± 0.64  | 0.50 ± 0.45  | 0.63 ± 0.76  | 0.94     | 1.29     |
| Firmicutes       | Clostridia       | Clostridiales      | <i>Ruminococcaceae</i>        | <i>Faecalibacterium</i>             | 8.84 ± 3.31  | 10.09 ± 4.39 | 10.26 ± 4.89 | 11.02 ± 4.88 | 10.60 ± 4.19 | 8.54 ± 3.10  | 0.95     | 1.28     |
| Firmicutes       | Clostridia       | Clostridiales      | <i>Lachnospiraceae</i>        | <i>Lachnospira</i>                  | 0.99 ± 1.12  | 1.32 ± 1.50  | 1.24 ± 1.53  | 1.88 ± 2.19  | 1.94 ± 2.19  | 1.85 ± 2.37  | 0.97     | 1.23     |
| Firmicutes       | Clostridia       | Clostridiales      | <i>Veillonellaceae</i>        | <i>Phascolarctobacterium</i>        | 0.29 ± 0.54  | 0.39 ± 0.77  | 0.47 ± 0.93  | 0.65 ± 1.29  | 0.61 ± 1.20  | 0.19 ± 0.37  | 0.98     | 1.20     |
| Firmicutes       | Clostridia       | Clostridiales      | <i>Ruminococcaceae</i>        | Unclassified                        | 1.73 ± 1.75  | 1.22 ± 1.08  | 1.34 ± 1.25  | 1.45 ± 1.34  | 1.31 ± 1.39  | 0.96 ± 0.84  | 0.98     | 1.19     |
| Firmicutes       | Erysipelotrichi  | Erysipelotrichales | <i>Erysipelotrichaceae</i>    | <i>Holdemania</i>                   | 0.03 ± 0.03  | 0.02 ± 0.03  | 0.03 ± 0.04  | 0.03 ± 0.04  | 0.02 ± 0.03  | 0.02 ± 0.02  | 0.98     | 1.18     |
| Firmicutes       | Bacilli          | Lactobacillales    | <i>Enterococcaceae</i>        | <i>Enterococcus</i>                 | 0.05 ± 0.08  | 0.02 ± 0.04  | 0.04 ± 0.07  | 0.03 ± 0.04  | 0.04 ± 0.07  | 0.02 ± 0.03  | 0.98     | 1.16     |
| Firmicutes       | Bacilli          | Gemellales         | <i>Gemellaceae</i>            | Unclassified                        | 0.01 ± 0.01  | 0.01 ± 0.00  | 0.01 ± 0.01  | 0.01 ± 0.00  | 0.01 ± 0.01  | 0.01 ± 0.01  | 0.98     | 1.15     |
| Firmicutes       | Bacilli          | Turicibacterales   | <i>Turicibacteraceae</i>      | <i>Turicibacter</i>                 | 0.15 ± 0.17  | 0.25 ± 0.39  | 0.22 ± 0.29  | 0.20 ± 0.27  | 0.14 ± 0.21  | 0.27 ± 0.39  | 0.98     | 1.14     |
| Firmicutes       | Clostridia       | Clostridiales      | <i>Lachnospiraceae</i>        | <i>Anaerostipes</i>                 | 0.19 ± 0.20  | 0.14 ± 0.18  | 0.11 ± 0.12  | 0.16 ± 0.20  | 0.12 ± 0.14  | 0.19 ± 0.27  | 0.98     | 1.13     |
| Firmicutes       | Clostridia       | Clostridiales      | <i>Ruminococcaceae</i>        | <i>Oscillospira</i>                 | 1.24 ± 1.03  | 1.53 ± 1.96  | 1.60 ± 1.81  | 1.14 ± 1.09  | 1.51 ± 1.65  | 2.00 ± 2.09  | 0.98     | 1.12     |
| Firmicutes       | Clostridia       | Clostridiales      | [ <i>Mogibacteriaceae</i> ]   | Unclassified                        | 0.06 ± 0.08  | 0.04 ± 0.05  | 0.04 ± 0.07  | 0.04 ± 0.07  | 0.03 ± 0.05  | 0.04 ± 0.06  | 0.99     | 1.09     |
| Firmicutes       | Clostridia       | Clostridiales      | <i>Veillonellaceae</i>        | <i>Megasphaera</i>                  | 1.07 ± 2.04  | 0.83 ± 1.58  | 0.89 ± 1.75  | 0.91 ± 1.81  | 0.72 ± 1.40  | 0.38 ± 0.73  | 0.99     | 1.08     |
| Firmicutes       | Clostridia       | Clostridiales      | Unclassified                  | Unclassified                        | 0.38 ± 0.24  | 0.32 ± 0.22  | 0.31 ± 0.26  | 0.39 ± 0.40  | 0.39 ± 0.24  | 0.37 ± 0.10  | 1.00     | 1.06     |
| Firmicutes       | Clostridia       | Clostridiales      | <i>Veillonellaceae</i>        | <i>Dialister</i>                    | 0.87 ± 1.03  | 0.63 ± 0.81  | 0.57 ± 0.77  | 0.67 ± 0.94  | 0.88 ±       |              |          |          |
