# Supplementary material for: Effect of storage and DNA extraction method on 16S rRNA-profiled fecal microbiota in Japanese adults
Source: PubMed Central journal article supplement (PMC6436037; doi:10.3164/jcbn.18-84), 2018-12-13
Supplement: jcbn18-84st02.pdf [file jcbn18-84st02.pdf]

**Supplemental Table 2.** Fecal microbiota composition at genus level in the samples extracted by four different methods

| Phylum                | Class                 | Order                    | Family                    | Genus                        | A                   | B                   | C                   | D                   | p values        | q value         |
|-----------------------|-----------------------|--------------------------|---------------------------|------------------------------|---------------------|---------------------|---------------------|---------------------|-----------------|-----------------|
| Actinobacteria        | Actinobacteria        | Actinomycetales          | Actinomycetaceae          | Actinomyces                  | 0.04 ± 0.01         | 0.08 ± 0.07         | 0.03 ± 0.02         | 0.03 ± 0.03         | 0.27            | 0.94            |
| <b>Actinobacteria</b> | <b>Actinobacteria</b> | <b>Bifidobacteriales</b> | <b>Bifidobacteriaceae</b> | <b>Bifidobacterium</b>       | <b>12.75 ± 3.64</b> | <b>9.78 ± 5.39</b>  | <b>14.14 ± 2.86</b> | <b>1.76 ± 0.76</b>  | <b>&lt;0.01</b> | <b>0.04</b>     |
| Actinobacteria        | Coriobacteria         | Coriobacteriales         | Coriobacteriaceae         | Collinsella                  | 2.54 ± 2.36         | 2.27 ± 2.21         | 2.88 ± 2.76         | 0.18 ± 0.10         | 0.31            | 0.97            |
| Actinobacteria        | Coriobacteria         | Coriobacteriales         | Coriobacteriaceae         | Eggerthella                  | 0.11 ± 0.06         | 0.09 ± 0.03         | 0.13 ± 0.07         | 0.02 ± 0.01         | 0.02            | 0.37            |
| Actinobacteria        | Actinobacteria        | Actinomycetales          | Microbacteriaceae         | Microbacterium               | 0.00 ± 0.00         | 0.01 ± 0.01         | 0.00 ± 0.00         | 0.00 ± 0.00         | 0.42            | 1.08            |
| Actinobacteria        | Actinobacteria        | Actinomycetales          | Propionibacteriaceae      | Propionibacterium            | 0.00 ± 0.01         | 0.00 ± 0.00         | 0.01 ± 0.02         | 0.02 ± 0.02         | 0.14            | 0.79            |
| Actinobacteria        | Actinobacteria        | Actinomycetales          | Williamsiaceae            | Williamsia                   | 0.00 ± 0.00         | 0.00 ± 0.00         | 0.00 ± 0.00         | 0.00 ± 0.01         | 0.42            | 0.98            |
| Bacteroidetes         | Bacteroidia           | Bacteroidales            | [Paraprevotellaceae]      | [Prevotella]                 | 0.01 ± 0.01         | 0.01 ± 0.01         | 0.02 ± 0.04         | 0.03 ± 0.06         | 0.74            | 0.96            |
| <b>Bacteroidetes</b>  | <b>Bacteroidia</b>    | <b>Bacteroidales</b>     | <b>Bacteroidaceae</b>     | <b>Bacteroides</b>           | <b>33.47 ± 4.07</b> | <b>35.41 ± 4.96</b> | <b>23.53 ± 3.24</b> | <b>59.01 ± 7.63</b> | <b>&lt;0.01</b> | <b>&lt;0.01</b> |
| Bacteroidetes         | Bacteroidia           | Bacteroidales            | [Odoribacteraceae]        | Odoribacter                  | 0.24 ± 0.29         | 0.21 ± 0.25         | 0.17 ± 0.24         | 0.47 ± 0.58         | 0.68            | 0.95            |
| Bacteroidetes         | Bacteroidia           | Bacteroidales            | Porphyromonadaceae        | Parabacteroides              | 1.86 ± 1.61         | 1.61 ± 1.49         | 1.14 ± 1.00         | 3.09 ± 2.43         | 0.44            | 0.94            |
| Bacteroidetes         | Bacteroidia           | Bacteroidales            | Porphyromonadaceae        | Porphyromonas                | 0.00 ± 0.00         | 0.00 ± 0.00         | 0.00 ± 0.00         | 0.00 ± 0.00         | 0.58            | 1.02            |
| Bacteroidetes         | Bacteroidia           | Bacteroidales            | Prevotellaceae            | Prevotella                   | 0.34 ± 0.45         | 0.33 ± 0.26         | 0.21 ± 0.26         | 1.09 ± 0.77         | 0.08            | 0.75            |
| Bacteroidetes         | Bacteroidia           | Bacteroidales            | [Barnesiellaceae]         | Unclassified                 | 0.19 ± 0.38         | 0.18 ± 0.34         | 0.09 ± 0.16         | 0.50 ± 0.97         | 0.74            | 0.95            |
| Bacteroidetes         | Bacteroidia           | Bacteroidales            | Rikenellaceae             | Unclassified                 | 0.42 ± 0.54         | 0.52 ± 0.66         | 0.41 ± 0.54         | 0.84 ± 0.88         | 0.79            | 0.96            |
| Bacteroidetes         | Bacteroidia           | Bacteroidales            | S24-7                     | Unclassified                 | 0.00 ± 0.00         | 0.04 ± 0.08         | 0.02 ± 0.04         | 0.09 ± 0.09         | 0.29            | 0.95            |
| Firmicutes            | Erysipelotrichi       | Erysipelotrichales       | Erysipelotrichaceae       | [Eubacterium]                | 1.48 ± 2.67         | 0.90 ± 1.54         | 2.13 ± 3.52         | 0.13 ± 0.16         | 0.67            | 0.97            |
| Firmicutes            | Clostridia            | Clostridiales            | Lachnospiraceae           | [Ruminococcus]               | 2.66 ± 2.12         | 2.31 ± 1.84         | 4.42 ± 3.93         | 1.90 ± 1.91         | 0.55            | 1.05            |
| Firmicutes            | Clostridia            | Clostridiales            | Veillonellaceae           | Acidaminococcus              | 0.01 ± 0.01         | 0.01 ± 0.01         | 0.00 ± 0.00         | 0.03 ± 0.04         | 0.10            | 0.66            |
| Firmicutes            | Clostridia            | Clostridiales            | [Tissierellaceae]         | Anaerococcus                 | 0.00 ± 0.01         | 0.00 ± 0.01         | 0.00 ± 0.00         | 0.00 ± 0.00         | 0.58            | 1.00            |
| Firmicutes            | Clostridia            | Clostridiales            | Eubacteriaceae            | Anaerofustus                 | 0.00 ± 0.00         | 0.00 ± 0.00         | 0.01 ± 0.01         | 0.00 ± 0.00         | 0.09            | 0.76            |
| Firmicutes            | Clostridia            | Clostridiales            | Lachnospiraceae           | Anaerostipes                 | 0.20 ± 0.26         | 0.23 ± 0.30         | 0.23 ± 0.36         | 0.14 ± 0.17         | 0.96            | 1.04            |
| Firmicutes            | Clostridia            | Clostridiales            | Ruminococcaceae           | Anaerotruncus                | 0.02 ± 0.02         | 0.02 ± 0.03         | 0.01 ± 0.01         | 0.08 ± 0.08         | 0.15            | 0.76            |
| Firmicutes            | Bacilli               | Bacillales               | Bacillaceae               | Bacillus                     | 0.02 ± 0.04         | 0.01 ± 0.01         | 0.02 ± 0.02         | 0.00 ± 0.01         | 0.60            | 0.99            |
| Firmicutes            | Clostridia            | Clostridiales            | Lachnospiraceae           | Blautia                      | 4.17 ± 2.22         | 4.01 ± 2.31         | 6.29 ± 3.72         | 0.86 ± 0.38         | 0.05            | 0.59            |
| Firmicutes            | Erysipelotrichi       | Erysipelotrichales       | Erysipelotrichaceae       | Bulleidia                    | 0.00 ± 0.01         | 0.00 ± 0.00         | 0.00 ± 0.00         | 0.01 ± 0.01         | 0.54            | 1.08            |
| Firmicutes            | Clostridia            | Clostridiales            | Ruminococcaceae           | Butyricoccus                 | 0.64 ± 0.37         | 0.62 ± 0.26         | 0.35 ± 0.23         | 0.28 ± 0.14         | 0.16            | 0.78            |
| Firmicutes            | Erysipelotrichi       | Erysipelotrichales       | Erysipelotrichaceae       | cc_115                       | 0.01 ± 0.01         | 0.02 ± 0.01         | 0.03 ± 0.05         | 0.03 ± 0.04         | 0.76            | 0.97            |
| Firmicutes            | Clostridia            | Clostridiales            | Clostridiaceae            | Clostridium                  | 0.19 ± 0.20         | 0.30 ± 0.34         | 0.25 ± 0.28         | 0.09 ± 0.09         | 0.66            | 0.98            |
| Firmicutes            | Erysipelotrichi       | Erysipelotrichales       | Erysipelotrichaceae       | Clostridium                  | 0.08 ± 0.07         | 0.12 ± 0.06         | 0.19 ± 0.15         | 0.06 ± 0.04         | 0.20            | 0.92            |
| Firmicutes            | Clostridia            | Clostridiales            | Lachnospiraceae           | Clostridium                  | 0.25 ± 0.16         | 0.33 ± 0.13         | 0.23 ± 0.20         | 0.43 ± 0.32         | 0.54            | 1.06            |
| Firmicutes            | Clostridia            | Clostridiales            | Ruminococcaceae           | Clostridium                  | 0.01 ± 0.01         | 0.00 ± 0.00         | 0.01 ± 0.01         | 0.00 ± 0.00         | 0.14            | 0.83            |
| Firmicutes            | Erysipelotrichi       | Erysipelotrichales       | Erysipelotrichaceae       | Coprobacillus                | 0.32 ± 0.40         | 0.32 ± 0.43         | 0.54 ± 0.56         | 0.05 ± 0.06         | 0.43            | 0.95            |
| Firmicutes            | Clostridia            | Clostridiales            | Lachnospiraceae           | Coprococcus                  | 2.42 ± 1.25         | 2.25 ± 1.21         | 1.30 ± 1.24         | 0.68 ± 0.36         | 0.12            | 0.72            |
| Firmicutes            | Clostridia            | Clostridiales            | Dehalobacteriaceae        | Dehalobacterium              | 0.00 ± 0.00         | 0.00 ± 0.00         | 0.00 ± 0.00         | 0.00 ± 0.00         | 1.00            | 1.03            |
| Firmicutes            | Clostridia            | Clostridiales            | Veillonellaceae           | Dialister                    | 0.48 ± 0.66         | 0.52 ± 0.86         | 0.50 ± 0.70         | 0.35 ± 0.24         | 0.98            | 1.04            |
| Firmicutes            | Clostridia            | Clostridiales            | Lachnospiraceae           | Dorea                        | 0.76 ± 0.65         | 0.70 ± 0.70         | 1.11 ± 0.98         | 0.37 ± 0.49         | 0.57            | 1.03            |
| Firmicutes            | Bacilli               | Lactobacillales          | Enterococcaceae           | Enterococcus                 | 0.02 ± 0.03         | 0.00 ± 0.00         | 0.04 ± 0.05         | 0.02 ± 0.02         | 0.55            | 1.04            |
| Firmicutes            | Clostridia            | Clostridiales            | Ruminococcaceae           | Faecalibacterium             | 9.03 ± 3.40         | 10.21 ± 4.61        | 8.13 ± 3.62         | 6.68 ± 4.02         | 0.64            | 0.98            |
| Firmicutes            | Bacilli               | Lactobacillales          | Carnobacteriaceae         | Granulicatella               | 0.00 ± 0.01         | 0.01 ± 0.01         | 0.01 ± 0.01         | 0.01 ± 0.01         | 0.77            | 0.97            |
| Firmicutes            | Erysipelotrichi       | Erysipelotrichales       | Erysipelotrichaceae       | Holdemania                   | 0.04 ± 0.05         | 0.05 ± 0.06         | 0.03 ± 0.04         | 0.03 ± 0.06         | 0.95            | 1.03            |
| Firmicutes            | Clostridia            | Clostridiales            | Lachnospiraceae           | Lachnospira                  | 1.04 ± 1.23         | 0.90 ± 1.06         | 0.95 ± 1.35         | 0.68 ± 0.49         | 0.97            | 1.03            |
| Firmicutes            | Bacilli               | Lactobacillales          | Lactobacillaceae          | Lactobacillus                | 0.04 ± 0.04         | 0.04 ± 0.03         | 0.10 ± 0.17         | 0.13 ± 0.18         | 0.63            | 0.98            |
| Firmicutes            | Bacilli               | Lactobacillales          | Streptococcaceae          | Lactococcus                  | 0.01 ± 0.02         | 0.01 ± 0.01         | 0.03 ± 0.07         | 0.00 ± 0.00         | 0.55            | 1.02            |
| Firmicutes            | Bacilli               | Lactobacillales          | Leuconostocaceae          | Leuconostoc                  | 0.01 ± 0.01         | 0.00 ± 0.00         | 0.01 ± 0.02         | 0.00 ± 0.00         | 0.59            | 0.98            |
| Firmicutes            | Clostridia            | Clostridiales            | Veillonellaceae           | Megamonas                    | 0.00 ± 0.01         | 0.01 ± 0.01         | 0.01 ± 0.02         | 0.08 ± 0.08         | 0.05            | 0.65            |
| Firmicutes            | Clostridia            | Clostridiales            | Veillonellaceae           | Megasphaera                  | 0.50 ± 0.89         | 0.51 ± 0.92         | 0.34 ± 0.63         | 0.05 ± 0.05         | 0.78            | 0.97            |
| Firmicutes            | Clostridia            | Clostridiales            | Ruminococcaceae           | Oscillospira                 | 1.64 ± 1.19         | 2.28 ± 1.63         | 1.26 ± 0.93         | 1.63 ± 1.25         | 0.72            | 0.97            |
| Firmicutes            | Clostridia            | Clostridiales            | [Tissierellaceae]         | Parvimonas                   | 0.01 ± 0.01         | 0.00 ± 0.00         | 0.00 ± 0.00         | 0.00 ± 0.01         | 0.72            | 0.99            |
| Firmicutes            | Clostridia            | Clostridiales            | [Tissierellaceae]         | Peptoniphilus                | 0.00 ± 0.00         | 0.00 ± 0.01         | 0.00 ± 0.00         | 0.01 ± 0.01         | 0.68            | 0.96            |
| Firmicutes            | Clostridia            | Clostridiales            | Veillonellaceae           | Phascolarctobacterium        | 0.46 ± 0.92         | 0.51 ± 0.97         | 0.25 ± 0.47         | 0.26 ± 0.43         | 0.94            | 1.03            |
| Firmicutes            | Clostridia            | Clostridiales            | Eubacteriaceae            | Pseudoramibacter_Eubacterium | 0.02 ± 0.04         | 0.02 ± 0.04         | 0.00 ± 0.00         | 0.00 ± 0.01         | 0.65            | 0.98            |
| Firmicutes            | Clostridia            | Clostridiales            | Lachnospiraceae           | Roseburia                    | 1.20 ± 1.10         | 1.61 ± 1.25         | 1.40 ± 1.05         | 1.07 ± 0.75         | 0.89            | 1.01            |
| Firmicutes            | Clostridia            | Clostridiales            | Ruminococcaceae           | Ruminococcus                 | 2.50 ± 3.86         | 2.68 ± 4.19         | 2.16 ± 3.81         | 3.10 ± 4.84         | 0.99            | 1.03            |
| Firmicutes            | Clostridia            | Clostridiales            | Clostridiaceae            | SMB53                        | 0.47 ± 0.31         | 0.36 ± 0.20         | 0.18 ± 0.10         | 0.24 ± 0.09         | 0.21            | 0.92            |
| Firmicutes            | Bacilli               | Lactobacillales          | Streptococcaceae          | Streptococcus                | 0.63 ± 0.42         | 0.51 ± 0.53         | 0.77 ± 0.57         | 0.49 ± 0.32         | 0.83            | 0.97            |
| Firmicutes            | Bacilli               | Turicibacterales         | Turicibacteraceae         | Turicibacter                 | 0.13 ± 0.11         | 0.07 ± 0.08         | 0.09 ± 0.11         | 0.05 ± 0.06         | 0.67            | 0.98            |
| Firmicutes            | Clostridia            | Clostridiales            | [Mogibacteriaceae]        | Unclassified                 | 0.04 ± 0.05         | 0.03 ± 0.04         | 0.05 ± 0.04         | 0.01 ± 0.01         | 0.60            | 0.97            |
| Firmicutes            | Clostridia            | Clostridiales            | Christensenellaceae       | Unclassified                 | 0.00 ± 0.01         | 0.01 ± 0.01         | 0.01 ± 0.01         | 0.00 ± 0.01         | 0.81            | 0.98            |
| Firmicutes            | Clostridia            | Clostridiales            | Clostridiaceae            | Unclassified                 | 0.09 ± 0.12         | 0.14 ± 0.23         | 0.19 ± 0.28         | 0.26 ± 0.42         | 0.85            | 0.98            |
| Firmicutes            | Erysipelotrichi       | Erysipelotrichales       | Erysipelotrichaceae       | Unclassified                 | 0.53 ± 0.49         | 0.39 ± 0.37         | 1.02 ± 0.93         | 0.16 ± 0.14         | 0.21            | 0.90            |
| Firmicutes            | Bacilli               | Gemellales               | Gemellaceae               | Unclassified                 | 0.01 ± 0.02         | 0.01 ± 0.01         | 0.01 ± 0.01         | 0.01 ± 0.02         | 0.83            | 0.98            |
| Firmicutes            | Clostridia            | Clostridiales            | Lachnospiraceae           | Unclassified                 | 4.18 ± 1.68         | 4.78 ± 2.04         | 7.39 ± 2.69         | 1.65 ± 0.72         | 0.01            | 0.20            |
| Firmicutes            | Clostridia            | Clostridiales            | Ruminococcaceae           | Unclassified                 | 2.51 ± 2.29         | 2.95 ± 2.91         | 1.55 ± 1.28         | 0.50 ± 0.32         | 0.35            | 0.97            |
| Firmicutes            | Clostridia            | Clostridiales            | Unclassified              | Unclassified                 | 0.48 ± 0.45         | 0.48 ± 0.47         | 0.27 ± 0.21         | 0.59 ± 0.71         | 0.83            | 0.99            |
| Firmicutes            | Clostridia            | Clostridiales            | Veillonellaceae           | Veillonella                  | 3.91 ± 3.40         | 3.25 ± 2.63         | 2.80 ± 2.82         | 2.62 ± 1.75         | 0.91            | 1.01            |
| Firmicutes            | Clostridia            | Clostridiales            | [Tissierellaceae]         | WAL_1855D                    | 0.01 ± 0.01         | 0.01 ± 0.01         | 0.00 ± 0.01         | 0.00 ± 0.00         | 0.33            | 0.97            |
| Fusobacteria          | Fusobacteriia         | Fusobacteriales          | Fusobacteriaceae          | Fusobacterium                | 0.03 ± 0.03         | 0.02 ± 0.03         | 0.02 ± 0.02         | 0.07 ± 0.04         | 0.10            | 0.75            |
| Fusobacteria          | Fusobacteriia         | Fusobacteriales          | Leptotrichiaceae          | Leptotrichia                 | 0.00 ± 0.01         | 0.00 ± 0.01         | 0.00 ± 0.00         | 0.02 ± 0.02         | 0.28            | 0.95            |
| Proteobacteria        | Deltaproteobacteria   | Desulfobivriionales      | Desulfobivriionaceae      | Bilophia                     | 0.19 ± 0.22         | 0.11 ± 0.13         | 0.06 ± 0.07         | 0.12 ± 0.17         | 0.73            | 0.97            |
| Proteobacteria        | Alphaproteobacteria   | Rhizobiales              | Bradyrhizobiaceae         | Bradyrhizobium               | 0.00 ± 0.00         | 0.03 ± 0.06         | 0.00 ± 0.00         | 0.01 ± 0.01         | 0.43            | 0.97            |
| Proteobacteria        | Epsilonproteobacteria | Campylobacteriales       | Campylobacteraceae        | Campylobacter                | 0.00 ± 0.00         | 0.00 ± 0.01         | 0.00 ± 0.00         | 0.01 ± 0.01         | 0.25            | 1.02            |
| Proteobacteria        | Gammaproteobacteria   | Enterobacteriales        | Enterobacteriaceae        | Citrobacter                  | 0.02 ± 0.04         | 0.03 ± 0.04         | 0.02 ± 0.02         | 0.08 ± 0.08         | 0.27            | 0.97            |
| Proteobacteria        | Betaproteobacteria    | Burkholderiales          | Comamonadaceae            | Delftia                      | 0.00 ± 0.00         | 0.01 ± 0.01         | 0.00 ± 0.00         | 0.02 ± 0.03         | 0.40            | 1.05            |
| Proteobacteria        | Gammaproteobacteria   | Enterobacteriales        | Enterobacteriaceae        | Escherichia                  | 1.29 ± 1.19         | 1.48 ± 1.47         | 0.56 ± 0.51         | 1.55 ± 1.13         | 0.59            | 1.00            |
| Proteobacteria        | Gammaproteobacteria   | Pasteurellales           | Pasteurellaceae           | Haemophilus                  | 0.14 ± 0.12         | 0.21 ± 0.21         | 0.06 ± 0.03         | 0.42 ± 0.27         | 0.07            | 0.74            |
| Proteobacteria        | Gammaproteobacteria   | Enterobacteriales        | Enterobacteriaceae        | Klebsiella                   | 0.05 ± 0.07         | 0.09 ± 0.11         | 0.02 ± 0.02         | 0.11 ± 0.06         | 0.34            | 0.99            |
| Proteobacteria        | Gammaproteobacteria   | Xanthomonadales          | Xanthomonadaceae          | Lysobacter                   | 0.00 ± 0.00         | 0.00 ± 0.00         | 0.48 ± 7.96         | 0.00 ± 0.00         | 0.02            | 0.34            |
| Proteobacteria        | Alphaproteobacteria   | Rhizobiales              | Methylobacteriaceae       | Methylobacterium             | 0.00 ± 0.00         | 0.13 ± 0.22         | 0.00 ± 0.00         | 0.00 ± 0.00         | 0.31            | 0.94            |
| Proteobacteria        | Betaproteobacteria    | Neisseriales             | Neisseriaceae             | Neisseria                    | 0.00 ± 0.00         | 0.00 ± 0.01         | 0.00 ± 0.01         | 0.04 ± 0.03         | 0.01            | 0.17            |
| Proteobacteria        | Betaproteobacteria    | Burkholderiales          | Comamonadaceae            | Pelomonas                    | 0.00 ± 0.00         | 0.08 ± 0.16         | 0.00 ± 0.00         | 0.00 ± 0.00         | 0.42            | 1.00            |
| Proteobacteria        | Gammaproteobacteria   | Pseudomonadales          | Pseudomonadaceae          | Pseudomonas                  | 0.33 ± 0.62         | 0.36 ± 0.61         | 0.04 ± 0.02         | 0.46 ± 0.34         | 0.63            | 0.99            |
| Proteobacteria        | Gammaproteobacteria   | Enterobacteriales        | Enterobacteriaceae        | Serratia                     | 0.00 ± 0.01         | 0.01 ± 0.01         | 0.00 ± 0.01         | 0.00 ± 0.00         | 0.71            | 0.99            |
| Proteobacteria        | Alphaproteobacteria   | Sphingomonadales         | Sphingomonadaceae         | Sphingomonas                 | 0.00 ± 0.00         | 0.00 ± 0.00         | 0.00 ± 0.00         | 0.01 ± 0.01         | 0.42            | 1.02            |
| Proteobacteria        | Gammaproteobacteria   | Xanthomonadales          | Xanthomonadaceae          | Stenotrophomonas             | 0.03 ± 0.07         | 0.05 ± 0.07         | 0.01 ± 0.01         | 0.01 ± 0.02         | 0.58            | 1.03            |
| Proteobacteria        | Betaproteobacteria    | Burkholderiales          | Alcaligenaceae            | Sutterella                   | 2.56 ± 1.43         | 2.26 ± 1.37         | 1.14 ± 0.62         |                     |                 |                 |
